# Supplementary material
Source: Springer Nature journal article supplement (https://www.springermedizin.de/resource/supplementary/12882_2011_362_MOESM4_ESM.pdf/9453656)

ROP-+/+

ROP-Os/+

C57-Os/+

TGF $\beta$ 1

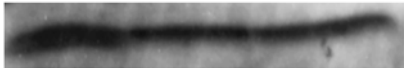

$\alpha$ -actin

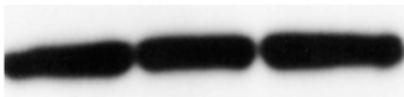

Supplement: MOESM4 [file 9453656]
